# Supplementary material
Source: Springer Nature journal article supplement (https://www.springermedizin.de/resource/supplementary/12955_2010_719_MOESM1_ESM.pdf/9561174)

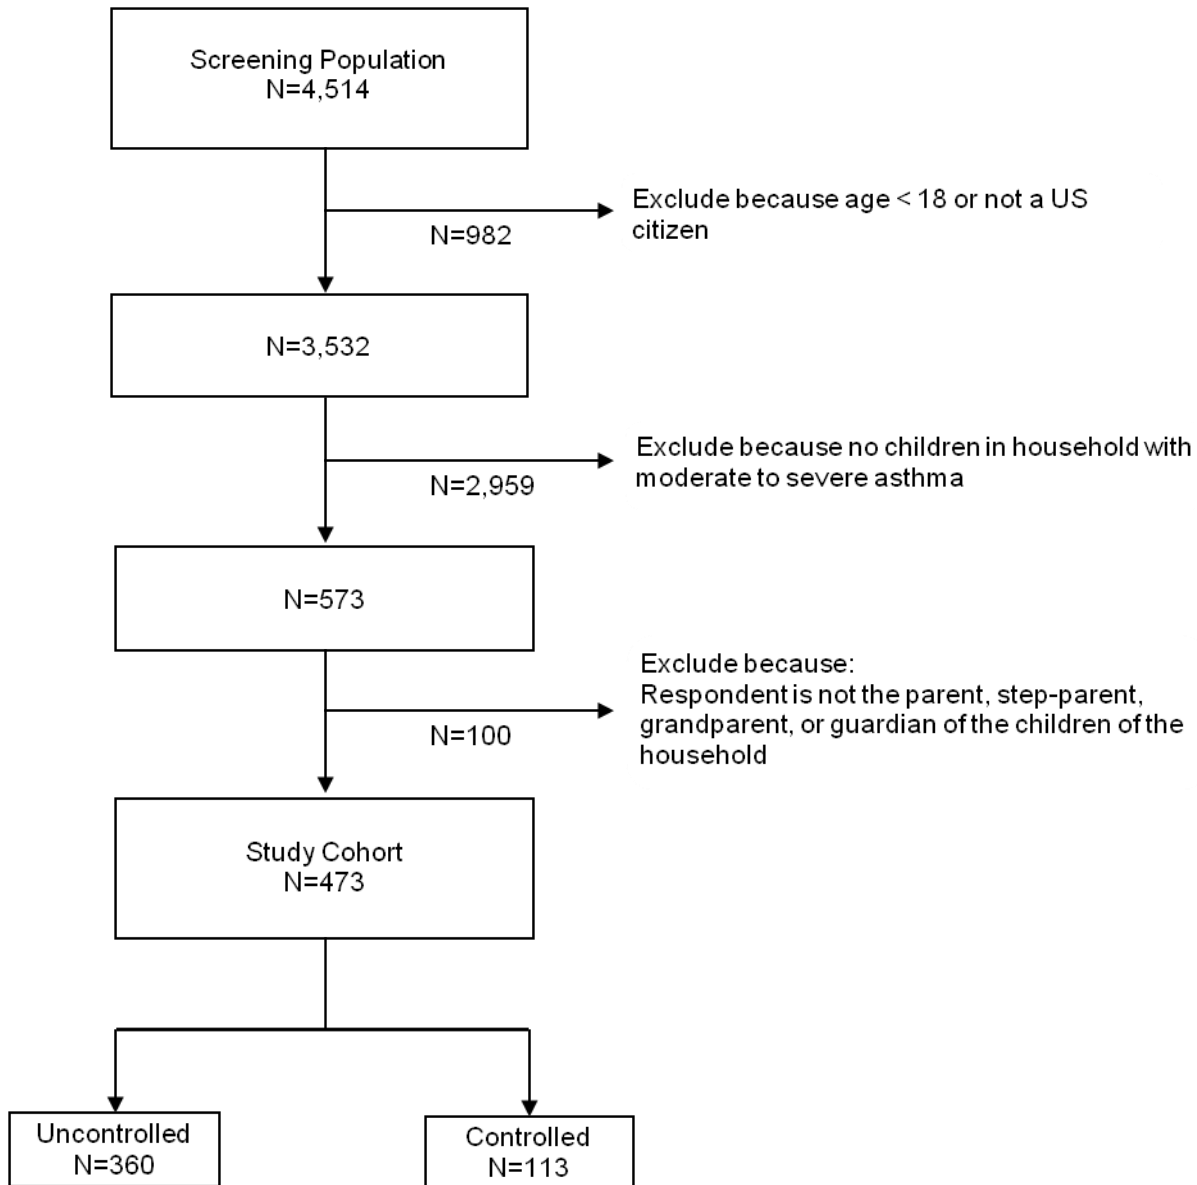

Supplement: MOESM1 [file 9561174]
